# Supplementary material for: Initial employment of α-benzoin oxime as a route to high-nuclearity metal clusters: decanuclear CuII complexes with a wheel topology
Source: Royal Society of Chemistry journal article supplement (doi:10.1039/b901990a), 2009-01-01
Supplement: b901990a.pdf [file b901990a.pdf]

**Initial employment of  $\alpha$ -benzoin oxime as a route to high-nuclearity  
metal clusters: Decanuclear  $\text{Cu}^{\text{II}}$  complexes with a wheel topology**

Gina C. Vlahopoulou,<sup>a</sup> Theocharis C. Stamatatos,<sup>b</sup> Vassilis Psycharis,<sup>c</sup> Spyros P. Perlepes\*<sup>a</sup> and George Christou\*<sup>b</sup>

<sup>a</sup> *Department of Chemistry, University of Patras, 265 04 Patras, Greece. E-mail: perlepes@patreas.upatras.gr; Tel: +30 2610 997146*

<sup>b</sup> *Department of Chemistry, University of Florida, Gainesville, Florida, 32611-7200, USA. E-mail: christou@chem.ufl.edu; Tel: +1 352 392 8314*

<sup>c</sup> *Department of Chemistry, Institute of Materials Science, NCSR "Demokritos", 153 10 Aghia Paraskevi Attikis, Greece.*

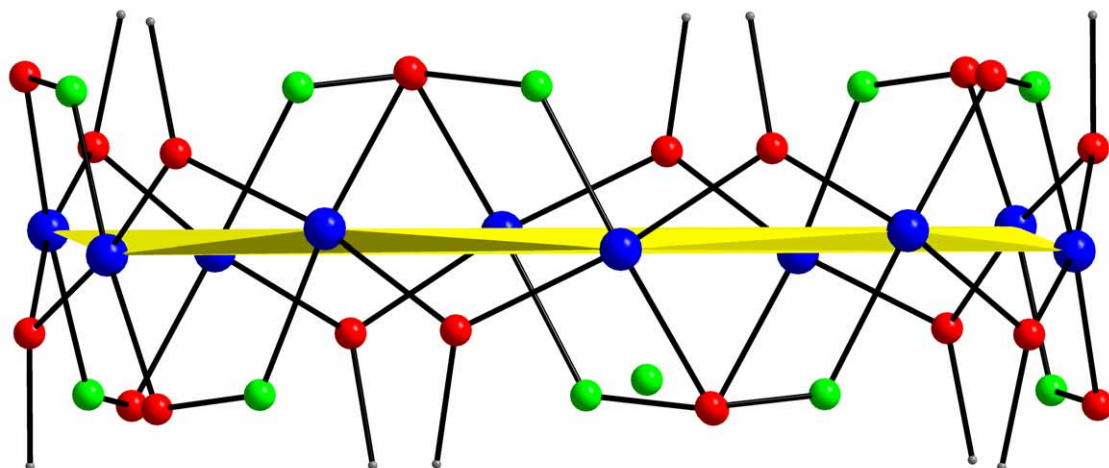

**Fig. S1** Side-view emphasizing the puckering on both **1** and **2**. Only the oximate (N-O) and alkoxide (RO<sup>-</sup>) groups of bzo<sub>x</sub><sup>2-</sup> are shown. Colour code: Cu blue, O red, N green, C grey.

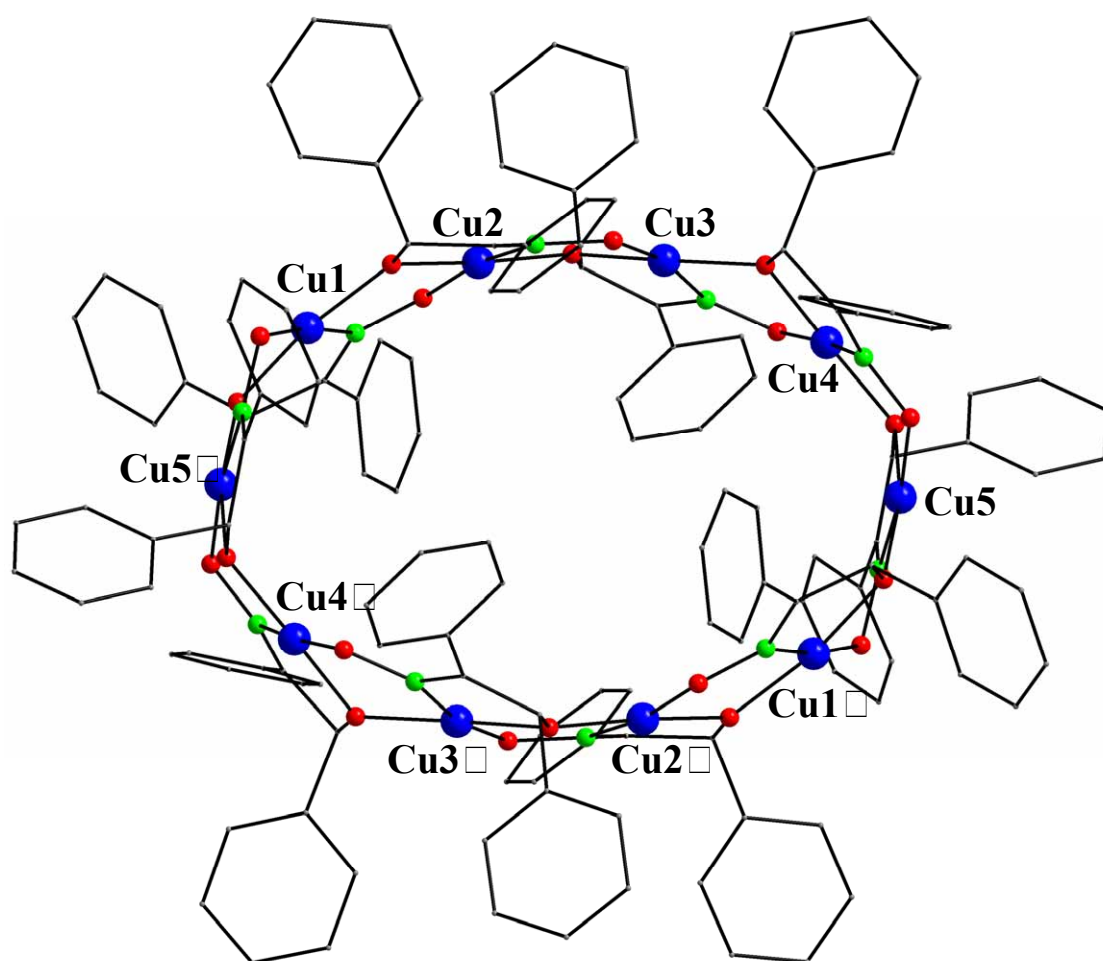

**Fig. S2** Molecular structure of **2** with Cu atom labels. Hydrogen atoms have been omitted for clarity. Colour code: Cu blue, O red, N green, C grey.

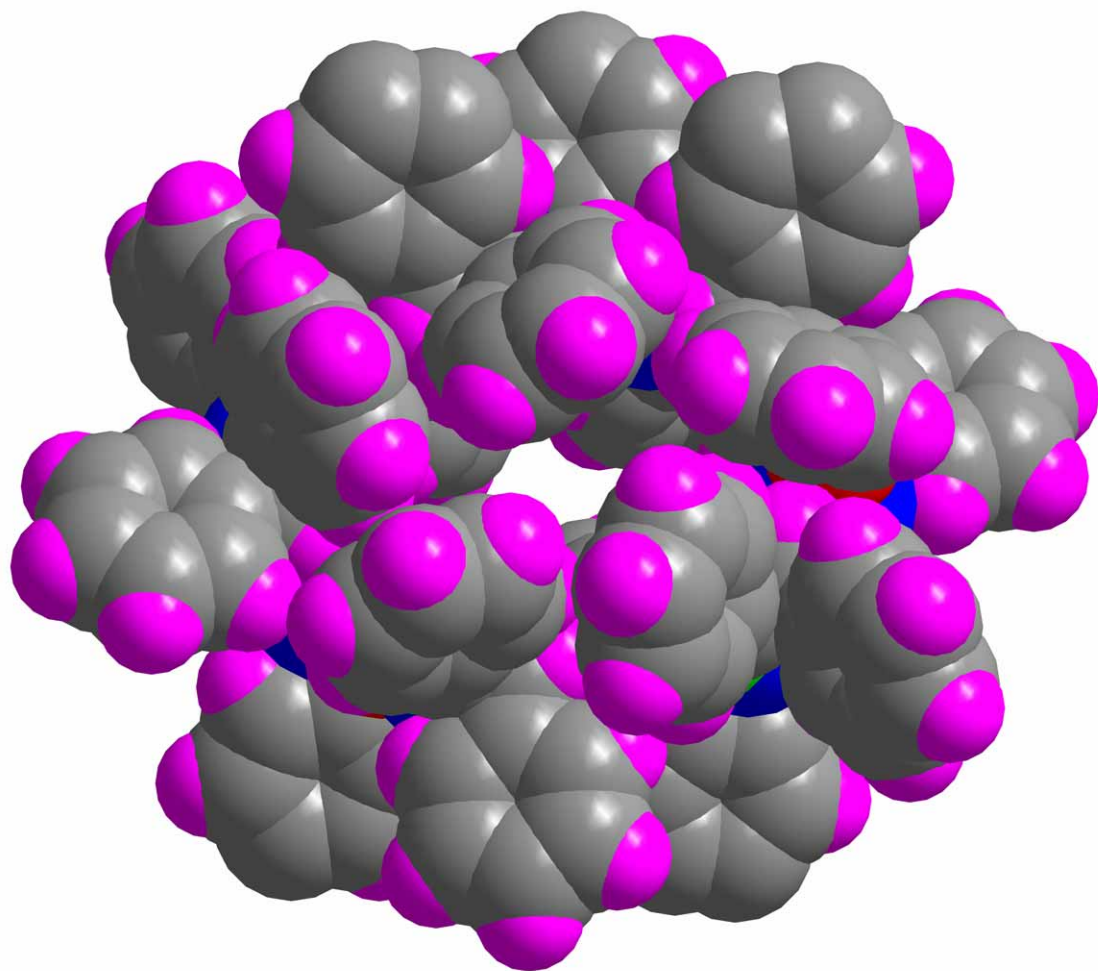

**Fig. S3** A space-filling representation of **2**. Colour code: Cu blue, O red, N green, C grey, H purple.
